# Supplementary material for: 4-Methyl-2,6-diformylphenol based biocompatible chemosensors for pH: discrimination between normal cells and cancer cells
Source: Royal Society of Chemistry journal article supplement (doi:10.1039/d0ra00754d), 2020-01-01
Supplement: d0ra00754d1.pdf [file d0ra00754d1.pdf]

## **4-Methyl-2,6-diformylphenol based biocompatible chemosensors for pH: discrimination between normal cell and cancer cell**

**Tanumoy Dhawa,<sup>a,†</sup> Ananta Hazra,<sup>a,†</sup> Arpita Barma,<sup>a</sup> Kunal Pal,<sup>b</sup> Parimal Karmakar<sup>b</sup> and Partha Roy<sup>a,\*</sup>**

<sup>a</sup> Department of Chemistry, Jadavpur University, Jadavpur, Kolkata-700 032, India.

E-mail: partha.roy@jadavpuruniversity.in; proy@chemistry.jdvu.ac.in

<sup>b</sup> Department of Life Science and Biotechnology, Jadavpur University, Kolkata 700032, India

<sup>†</sup> Contributed equally

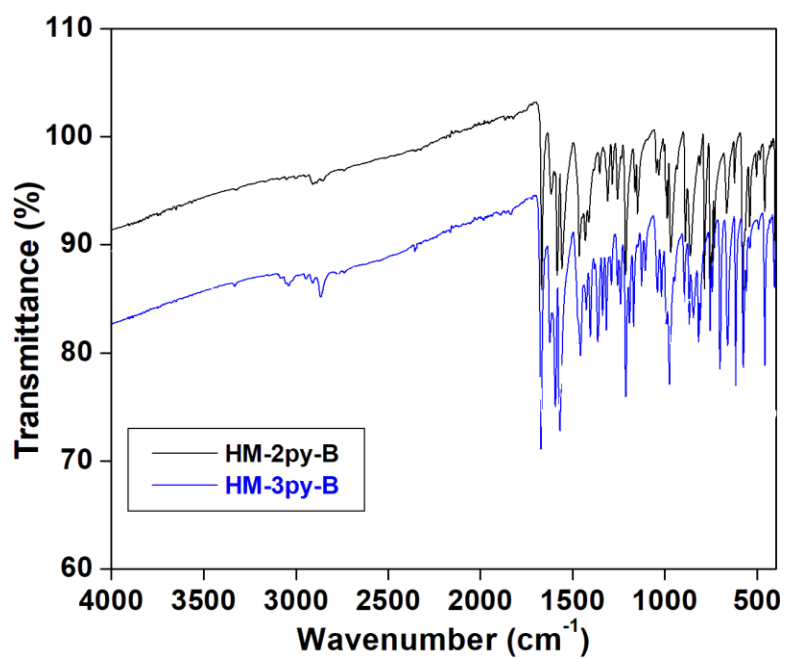

**Fig. s1** FT-IR spectra of HM-2py-B and HM-3py-B. Y-axis of spectrum of HM-2py-B has been offset by 10 units to gain some clarity in the figure.

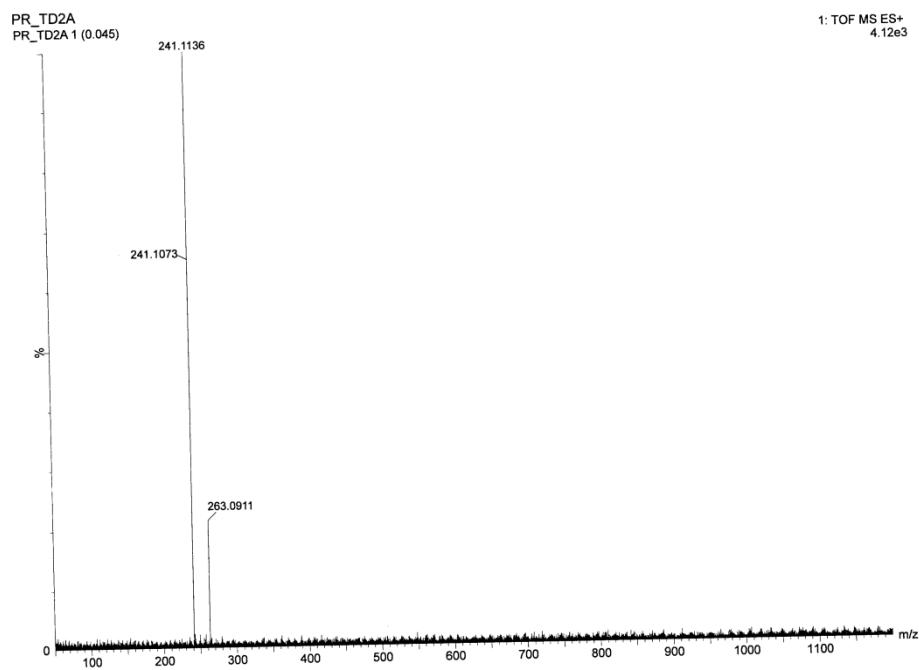

**Fig. s2** ESI mass spectrum of HM-2py-B in methanol

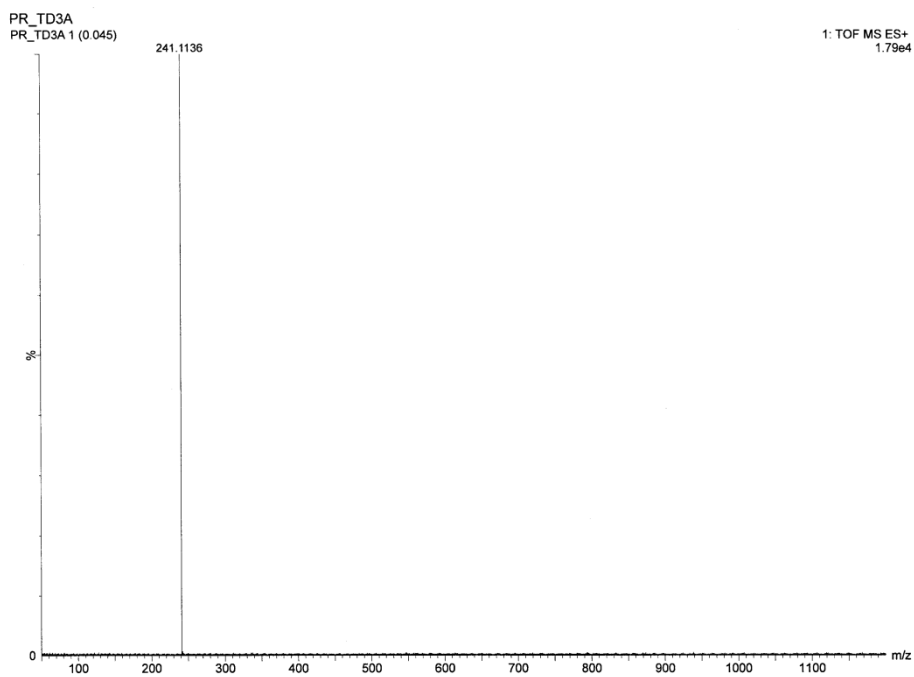

**Fig. s3** ESI mass spectrum of HM-3py-B in methanol

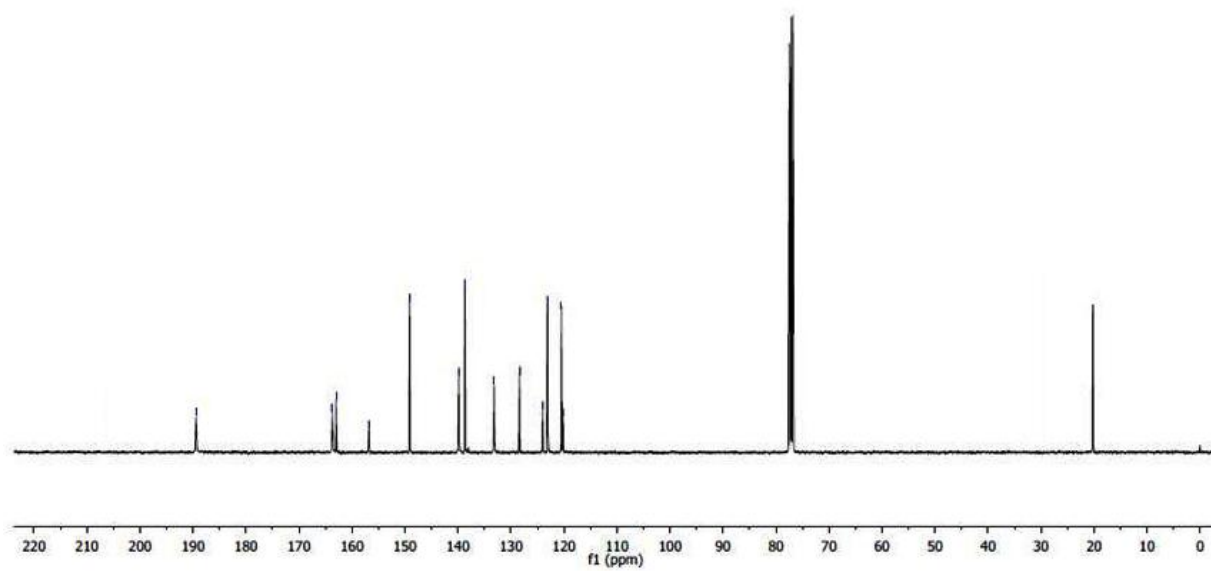

**Fig. s5**  $^{13}\text{C}$  NMR spectrum of HM-2py-B in  $\text{CDCl}_3$ .

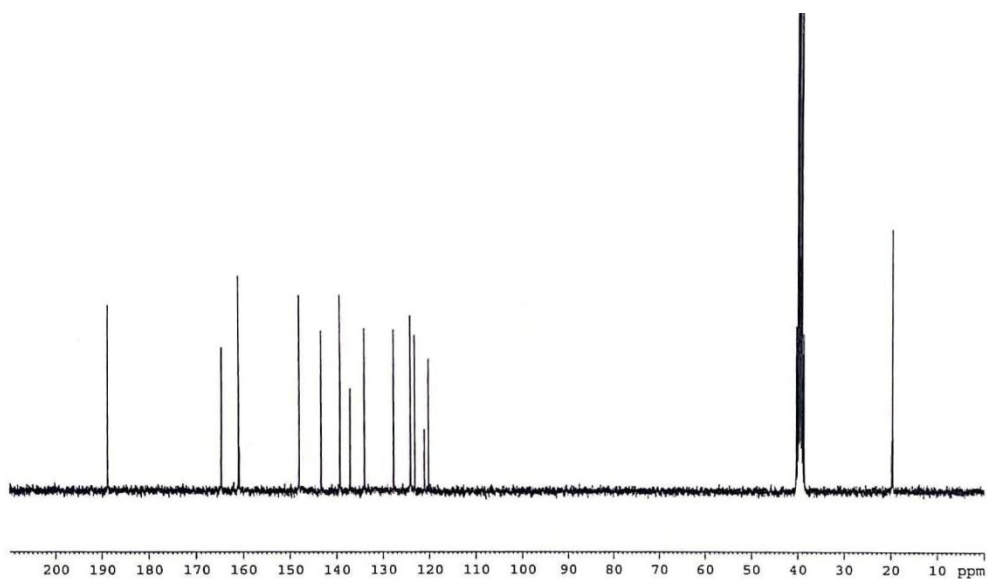

**Fig. s6**  $^{13}\text{C}$  NMR spectrum of HM-3py-B in  $\text{CDCl}_3$ .

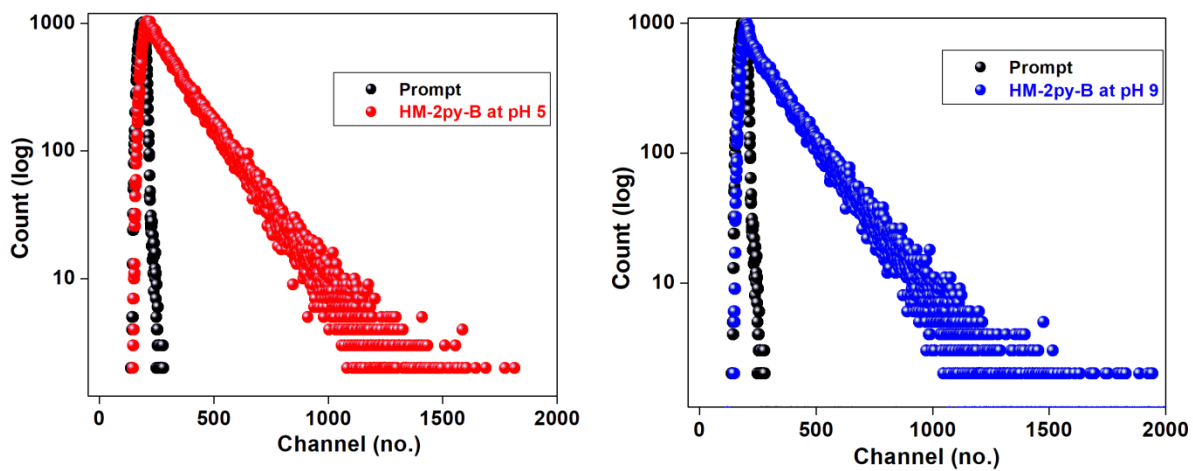

**Fig. s7** Excited state fluorescence decay of HM-2py-B at pH 5.0 and 9.0.

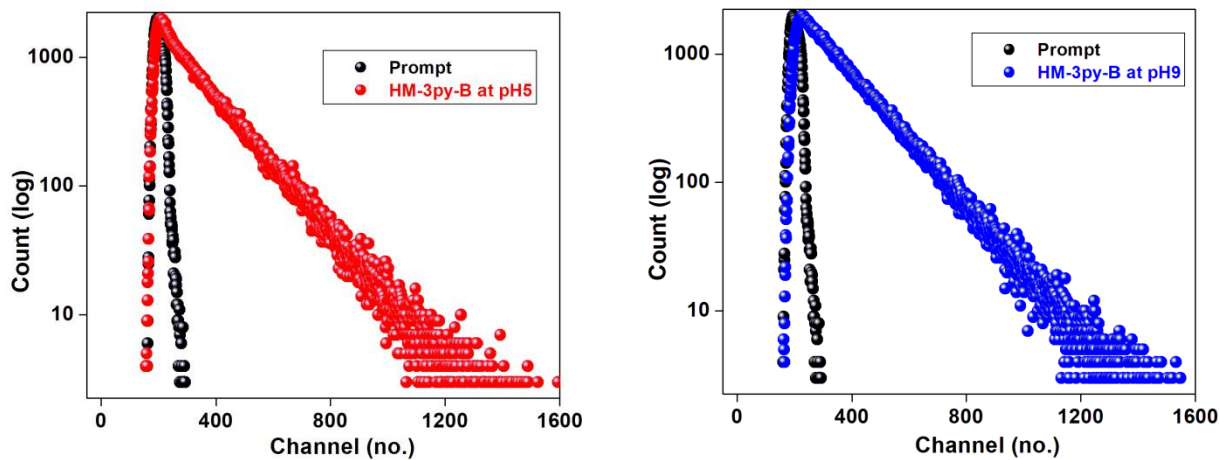

**Fig. s8** Excited state fluorescence decay of HM-3py-B at pH 5.0 and 9.0.

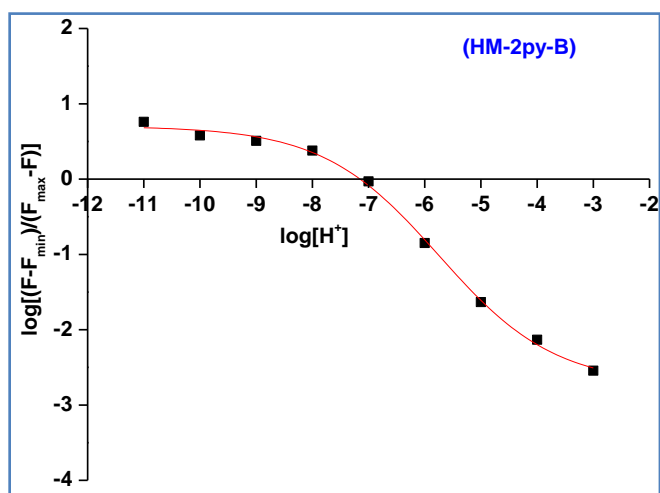

**Fig. s9** Plot of  $\log[(F_{\max} - F)/(F - F_{\min})]$  vs.  $\log[H^+]$  for HM-2py-B

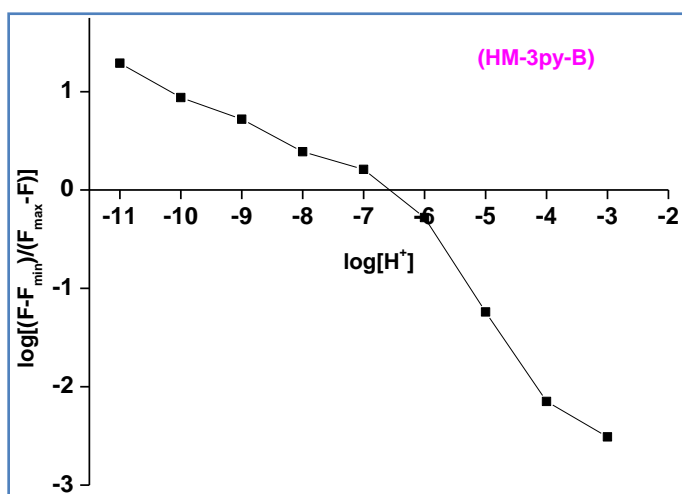

**Fig. s10** Plot of  $\log[(F_{\max} - F)/(F - F_{\min})]$  vs.  $\log[H^+]$  for HM-3py-B

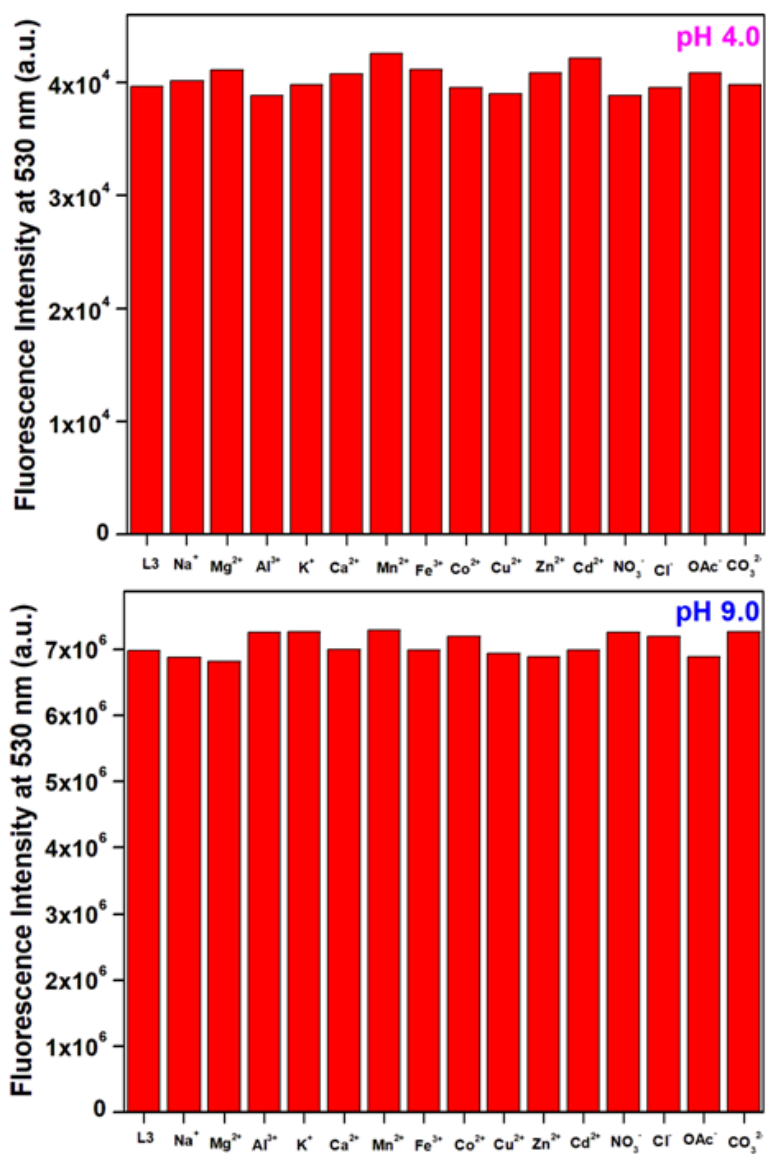

**Fig. s11** Fluorescence intensity of HM-3py-B in the presence of different cations and anions at pH 4.0 and pH 9.0. Here L3 denotes HM-3py-B.

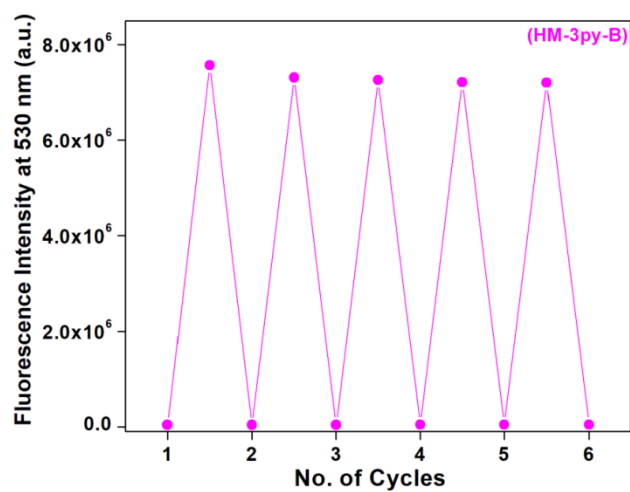

**Fig. s12** Fluorescence reversibility of HM-3py-B between pH 4 and 9

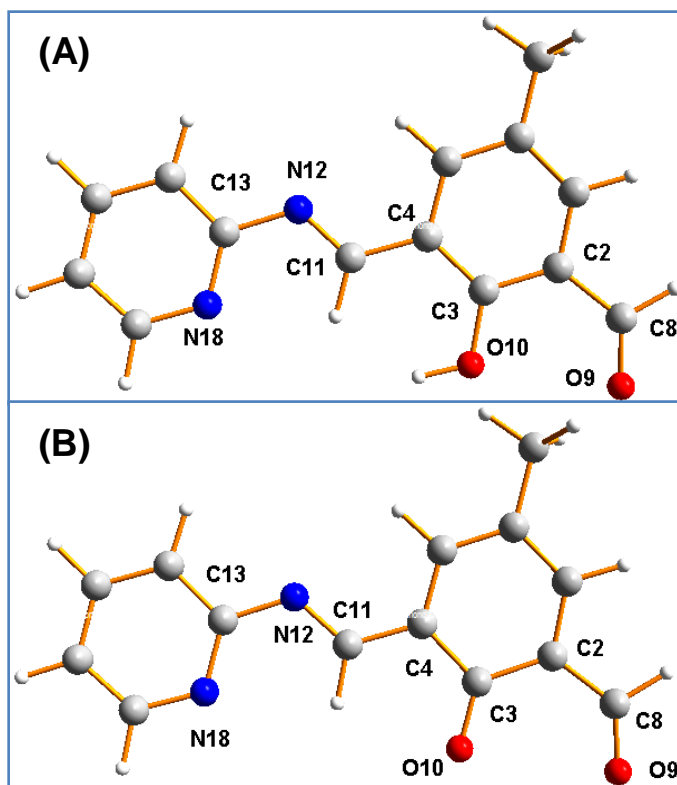

**Fig. s13** Optimized structures of (A) HM-2py-B and (B) its anionic species

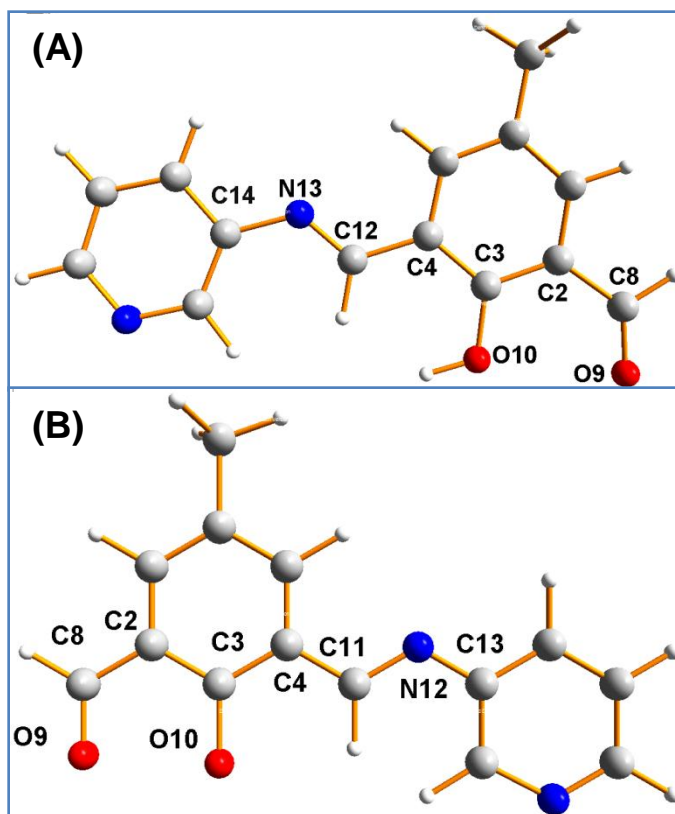

**Fig. s14** Optimized structures of (A) HM-3py-B and (B) its anionic species



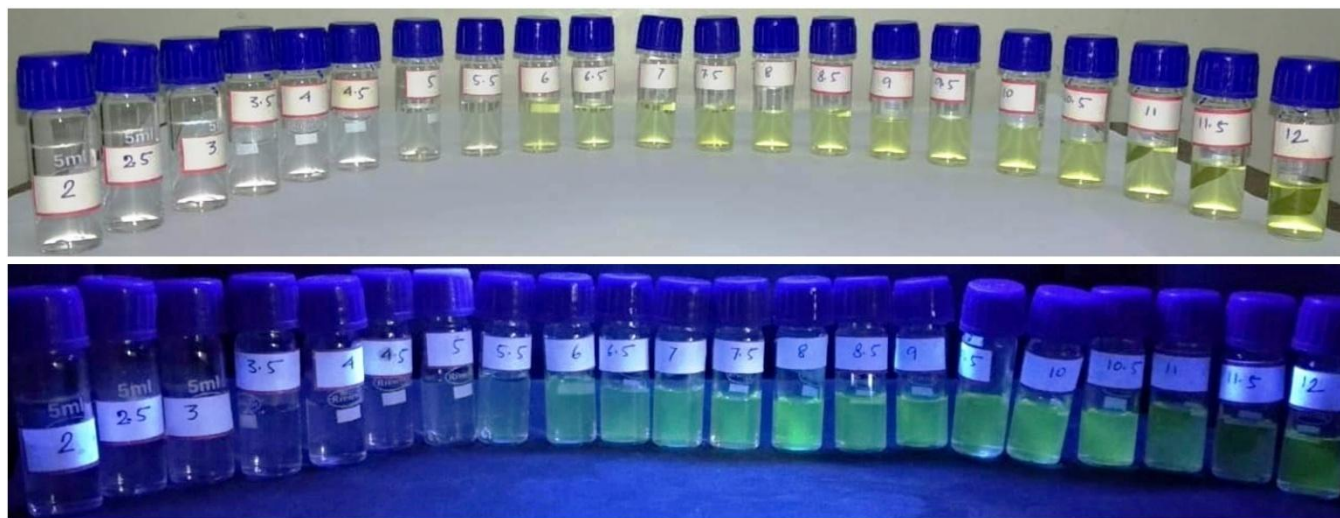

**Fig. s15** Colors of HM-2py-B in the presence of different pH media under visible light (upper row) and UV light (lower row) in Britton Robinson buffer at room temperature.

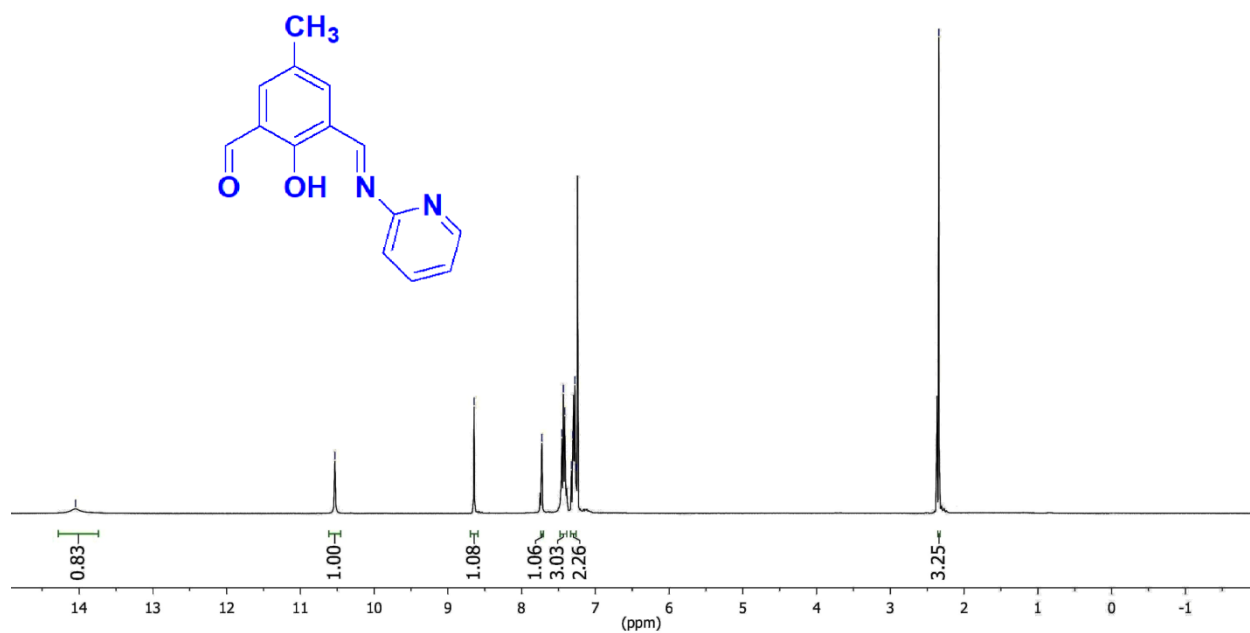

**Fig. s16**  $^1\text{H}$  NMR spectrum of HM-2py-B in  $\text{CDCl}_3$

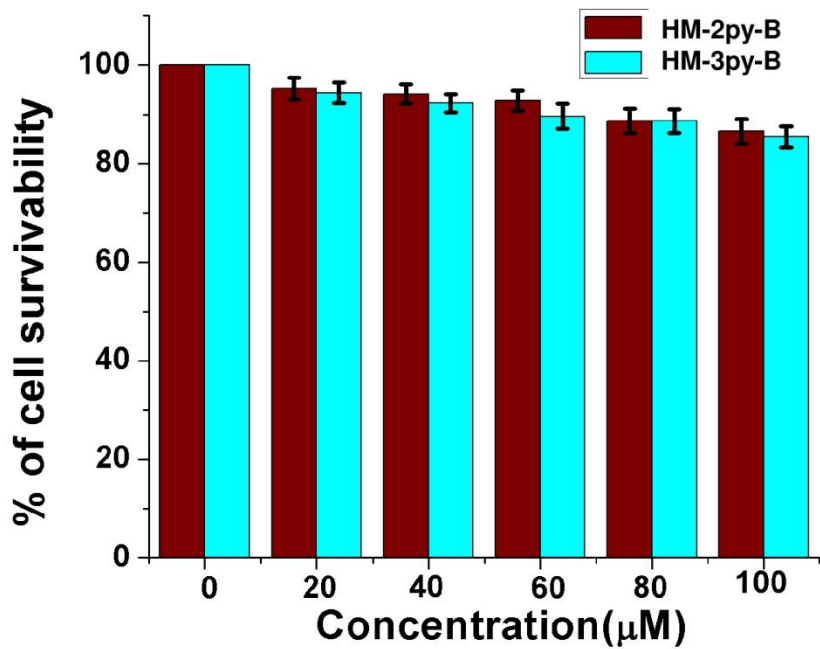

**Fig. s17** Cell survivability assay on normal human lung fibroblast, WI38 cells.

**Table s1** Selected bond lengths (Å) and bond angles (°) of HM-2py-B

| Parameter   |           |
|-------------|-----------|
| O1–C5       | 1.222(7)  |
| O2–C6       | 1.341(6)  |
| N1–C9       | 1.297(6)  |
| N1–C10      | 1.408(7)  |
| C2–C3       | 1.376(7)  |
| C2–C8       | 1.397(7)  |
| C2–C1       | 1.505(7)  |
| C4–C6       | 1.392(7)  |
| C4–C3       | 1.414(7)  |
| C4–C5       | 1.464(7)  |
| C11–C12     | 1.328(8)  |
| C11–C10     | 1.329(7)  |
| C9–C7       | 1.435(7)  |
| C6–C7       | 1.417(6)  |
| C7–C8       | 1.395(6)  |
| C10–N2      | 1.387(7)  |
| C12–C13     | 1.369(8)  |
| C14–N2      | 1.371(8)  |
| C14–C13     | 1.392(10) |
|             |           |
| C9–N1–C10   | 120.3(4)  |
| C3–C2–C8    | 117.8(4)  |
| C3–C2–C1    | 121.4(5)  |
| C8–C2–C1    | 120.8(5)  |
| C6–C4–C3    | 119.2(4)  |
| C6–C4–C5    | 121.4(4)  |
| C3–C4–C5    | 119.4(5)  |
| C12–C11–C10 | 118.0(5)  |
| N1–C9–C7    | 121.3(4)  |
| C2–C3–C4    | 122.3(5)  |
| O2–C6–C4    | 119.6(4)  |
| O2–C6–C7    | 120.9(4)  |
| C4–C6–C7    | 119.5(4)  |
| C8–C7–C6    | 119.2(4)  |
| C8–C7–C9    | 118.8(4)  |
| C6–C7–C9    | 122.0(4)  |
| C7–C8–C2    | 122.0(4)  |
| C11–C10–N2  | 122.7(5)  |
| C11–C10–N1  | 119.8(4)  |
| N2–C10–N1   | 117.6(5)  |
| C11–C12–C13 | 123.6(6)  |
| N2–C14–C13  | 118.8(6)  |

**Table s2** Selected bond lengths (Å) and bond angles (°) of HM-3py-B

| Parameter  |          |
|------------|----------|
| O2–C6      | 1.355(7) |
| N1–C9      | 1.284(7) |
| N1–C10     | 1.418(7) |
| O1–C5      | 1.195(8) |
| C2–C3      | 1.380(7) |
| C2–C8      | 1.381(7) |
| C2–C1      | 1.506(8) |
| C4–C6      | 1.396(8) |
| C4–C3      | 1.389(8) |
| C4–C6      | 1.396(8) |
| C4–C5      | 1.454(8) |
| C7–C8      | 1.393(7) |
| C7–C6      | 1.395(7) |
| C7–C9      | 1.447(8) |
| N2–C13     | 1.331(8) |
| N2–C14     | 1.335(8) |
| C11–C12    | 1.368(9) |
| C11–C10    | 1.378(8) |
| C13–C12    | 1.355(9) |
|            |          |
| C9–N1–C10  | 120.9(5) |
| C3–C2–C8   | 117.6(5) |
| C3–C2–C1   | 122.0(6) |
| C8–C2–C1   | 120.5(5) |
| C3–C4–C6   | 119.3(5) |
| C3–C4–C5   | 119.8(6) |
| C6–C4–C5   | 120.9(6) |
| C8–C7–C6   | 119.1(6) |
| C8–C7–C9   | 119.3(5) |
| C6–C7–C9   | 121.6(6) |
| C2–C3–C4   | 122.2(6) |
| O2–C6–C7   | 121.1(6) |
| O2–C6–C4   | 119.4(5) |
| C7–C6–C4   | 119.5(6) |
| C13–N2–C14 | 116.4(6) |
| C2–C8–C7   | 122.3(5) |
| C11–C10–N1 | 117.5(6) |
| C14–C10–N1 | 125.0(6) |
| N1–C9–C7   | 122.1(5) |
| N2–C13–C12 | 123.4(7) |
| O1–C5–C4   | 125.7(7) |

**Table s3** Selected bond lengths (Å) and bond angles (°) of optimized HM-2py-B, HM-3py-B and their anions from DFT calculations

|                   |         |        |              |        |
|-------------------|---------|--------|--------------|--------|
| HM-2py-B          | N18-C13 | 1.3562 | N18- C13-N12 | 120.25 |
|                   | C13-N12 | 1.4144 | C13-N12-C11  | 120.04 |
|                   | N12-C11 | 1.2967 | N12-C11-C4   | 121.88 |
|                   | C11-C4  | 1.4586 | C11-C4-C3    | 121.39 |
|                   | C4-C3   | 1.4169 | C4-C3-O10    | 123.28 |
|                   | C3-O10  | 1.3753 | C2-C3-O10    | 116.85 |
|                   | C3-C2   | 1.4165 | C2-C8-O9     | 128.09 |
|                   | C2-C8   | 1.4758 |              |        |
|                   | C8-O9   | 1.2383 |              |        |
| Anion of HM-2py-B | N18-C13 | 1.3675 | N18- C13-N12 | 122.25 |
|                   | C13-N12 | 1.3909 | C13-N12-C11  | 120.65 |
|                   | N12-C11 | 1.3215 | N12-C11-C4   | 122.7  |
|                   | C11-C4  | 1.4311 | C11-C4-C3    | 118.01 |
|                   | C4-C3   | 1.4766 | C4-C3-O10    | 121.66 |
|                   | C3-O10  | 1.2717 | C2-C3-O10    | 123.43 |
|                   | C3-C2   | 1.4731 | C2-C8-O9     | 130.0  |
|                   | C2-C8   | 1.454  |              |        |
|                   | C8-O9   | 1.2492 |              |        |
| HM-3py-B          | C14-N13 | 1.4144 | C14-N13-C12  | 124.29 |
|                   | N13-C12 | 1.2934 | N13-C12-C4   | 121.68 |
|                   | C12-C4  | 1.4625 |              |        |
|                   | C4-C3   | 1.4165 | C4-C3-O10    | 123.58 |
|                   | C3-C2   | 1.4163 | O10-C3-C2    | 116.53 |
|                   | C2-C8   | 1.4766 | C2-C8-O9     | 128.03 |
|                   | C8-O9   | 1.2381 |              |        |
|                   | C3-O10  | 1.3772 |              |        |

|                   |         |        |             |        |
|-------------------|---------|--------|-------------|--------|
| Anion of HM-3py-B | C13-N12 | 1.26   | C13-N12-C11 | 120.0  |
|                   | N12-C11 | 1.26   | N12-C11-C4  | 120.0  |
|                   | C11-C4  | 1.337  |             |        |
|                   | C4-C3   | 1.3369 | C4-C3-O10   | 125.87 |
|                   | C3-C2   | 1.337  | O10-C3-C2   | 123.71 |
|                   | C2-C8   | 1.351  | C2-C8-O9    | 121.44 |
|                   | C8-O9   | 1.208  |             |        |
|                   | C3-O10  | 1.355  |             |        |
